# Supplementary material
Source: publisher figshare collection journal article supplement (https://acs.figshare.com/ndownloader/files/4072936)
Supplement: Supplementary file 1 [file 4072936]

# Hierarchical Composite Structures Prepared by Electrophoretic Deposition of Carbon Nanotubes onto Glass Fibers

*Qi An<sup>≡‡</sup>, Andrew N. Rider<sup>#</sup> and Erik T. Thostenson<sup>†‡≡\*</sup>*

<sup>≡</sup>Department of Materials Science and Engineering, <sup>†</sup>Department of Mechanical Engineering  
and <sup>‡</sup>Center for Composite Materials, University of Delaware, Newark, DE 19716

<sup>#</sup>Defence Science and Technology Organization, Fisherman's Bend, Victoria 3207, Australia

**SUPPLEMENTARY DATA**

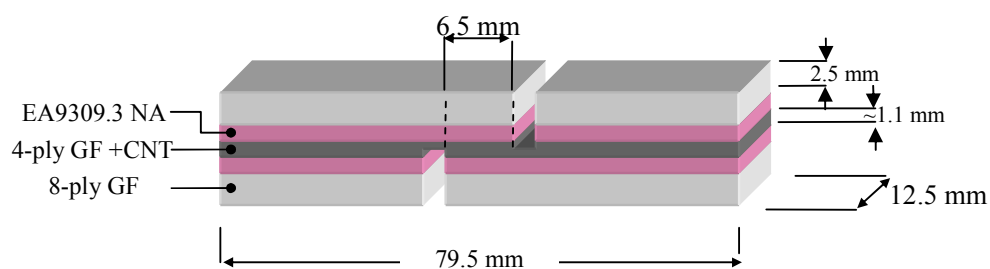

**Figure S1.** The configuration and dimensions of the test specimen used for measuring the in-plane shear strength of the CNT treated E-glass fiber. The 4-ply MWCNT treated laminate was bonded to two thicker outer laminates using EA9309.3NA adhesive.

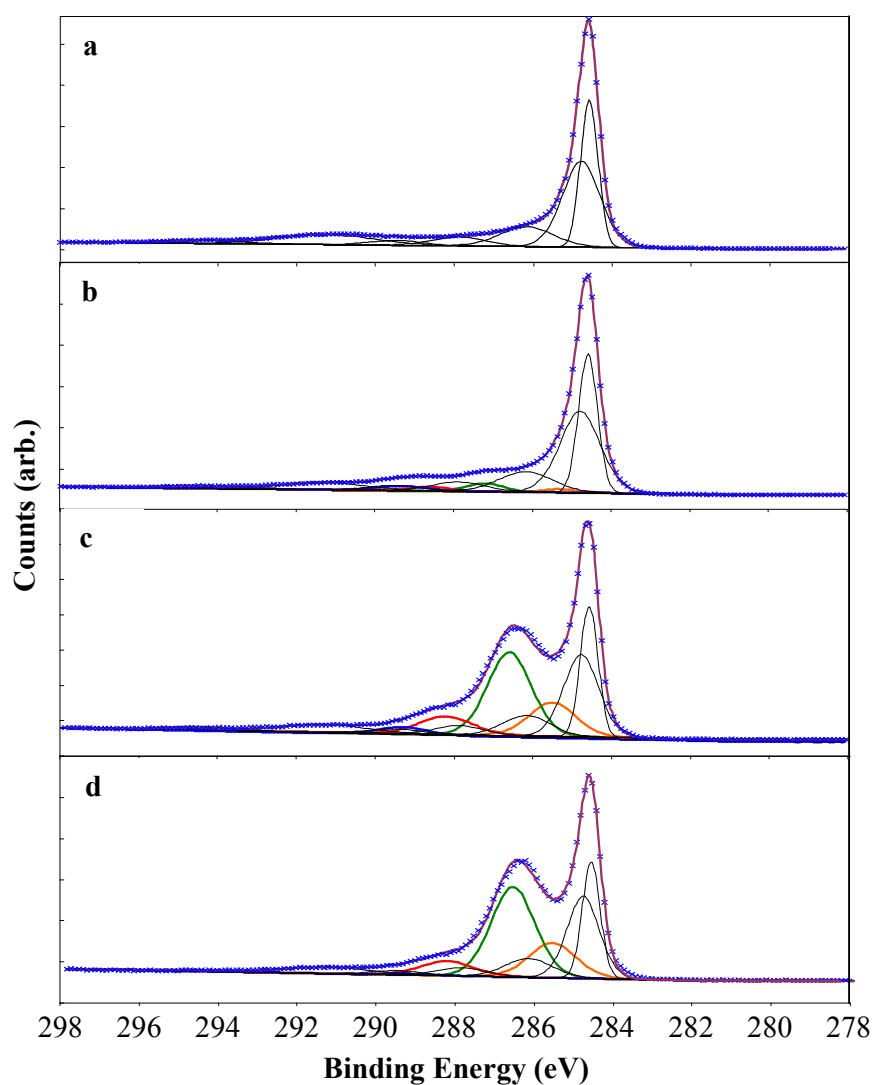

**Figure S2.** C 1s photoelectron spectra for (a) untreated CNTs, (b) ozone treated CNTs, (c) ozone and PEI treated CNTs and (d) ozone, PEI and GPS treated CNTs

**Table S1.** C 1s peak-fitting components as shown in Figure S1 for CNTs functionalized using ozone, PEI and GPS treatments

| Sample              | Atomic Concentration (%) |                 |                 |                 |                 |                         |
|---------------------|--------------------------|-----------------|-----------------|-----------------|-----------------|-------------------------|
| Binding Energy (eV) | 284.6                    | 285.3-<br>285.5 | 286.5-<br>287.2 | 288.2-<br>288.6 | 289.0-<br>289.3 | 291.3                   |
| Component           | Graphite                 | C-C             | C-O/<br>C-N     | C=O/<br>C=N     | O-C=O/<br>O-C=N | $\pi \rightarrow \pi^*$ |
| CNT                 | 85.60                    | 0.00            | 0.00            | 0.00            | 0.00            | 14.03                   |
| CNT-OZONE           | 71.89                    | 1.18            | 2.85            | 1.56            | 2.09            | 7.47                    |
| CNT-OZONE-PEI       | 36.08                    | 8.39            | 19.23           | 5.13            | 0.78            | 4.36                    |
| CNT-OZONE-PEI-GPS   | 34.44                    | 9.13            | 21.90           | 4.39            | 0.38            | 3.48                    |

**Table S2.** N 1s peak-fitting components for E-glass fabric before and after EPD with deionized water, PEI and GPS and CNTs functionalized using ozone, PEI

| Sample                          | Atomic Concentration (%) |       |                 |                 |                 |
|---------------------------------|--------------------------|-------|-----------------|-----------------|-----------------|
| Binding Energy (eV)             | 398.0                    | 398.9 | 399.8-<br>400.1 | 400.9-<br>401.5 | 402.1-<br>402.5 |
| H <sub>2</sub> O EPD of E-GLASS |                          |       | 1.6             | 0.8             | 1.1             |
| PEI EPD of E-glass              |                          | 6.0   | 1.7             | 1.0             |                 |
| EPD of CNT-OZONE-<br>PEI        | 1.0                      |       | 8.6             | 2.6             | 1.7             |

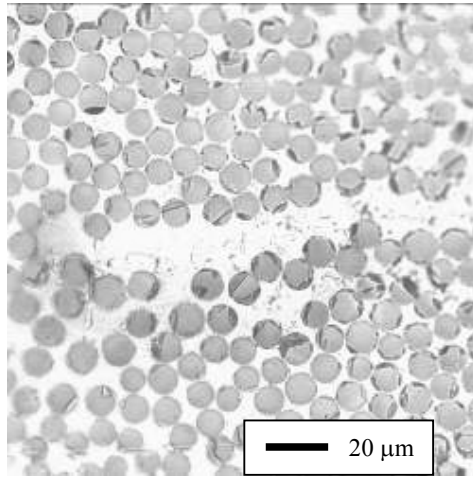

Baseline

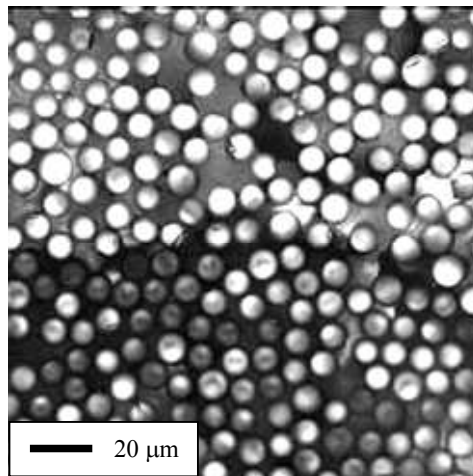

EPD-CNT-2

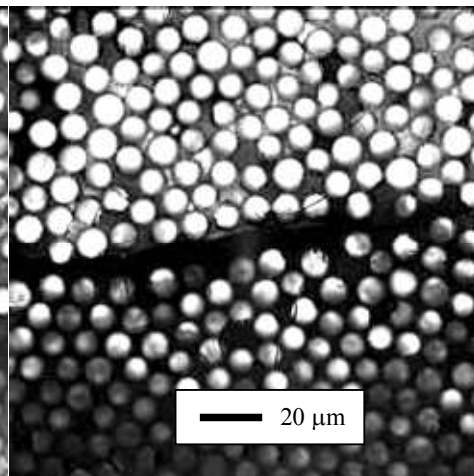

EPD-CNT-7

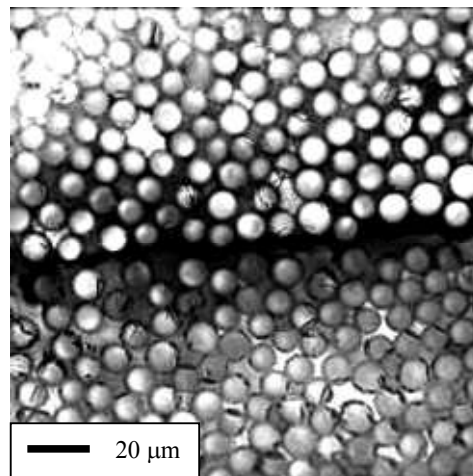

EPD-CNT-4

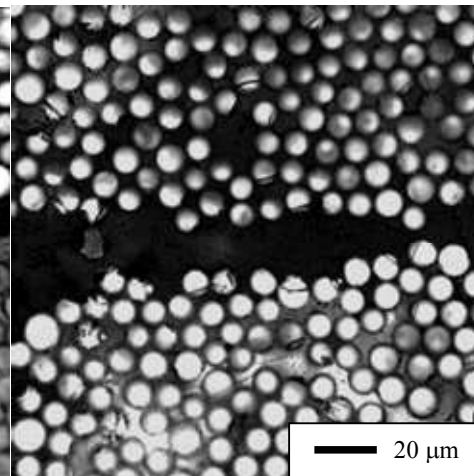

EPD-CNT-5

**Figure S3.** Optical images acquired using transmitted light for thin cross-sections of in-plane shear specimens indicating the interlaminar resin rich region and coating distribution through the laminate thickness

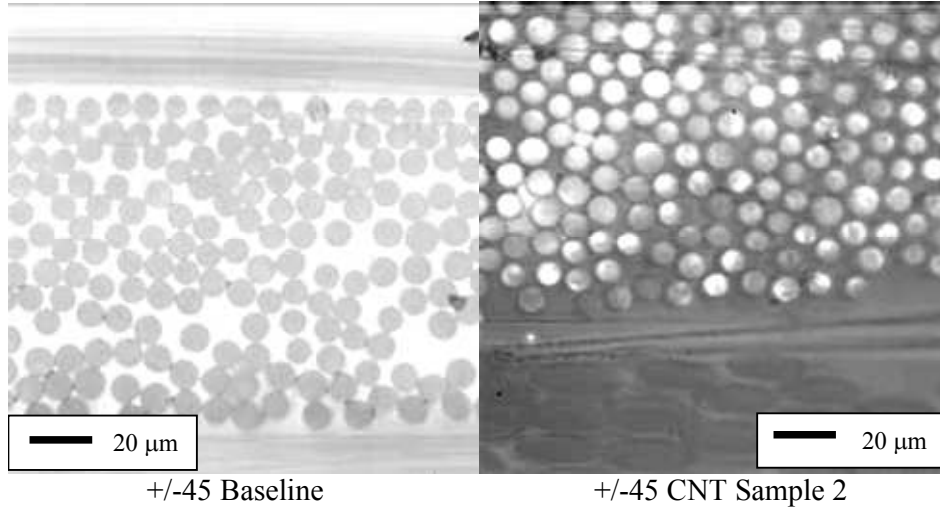

**Figure S4.** Optical images acquired using transmitted light for thin cross-sections of +/-45 shear specimens indicating the coating distribution through the laminate thickness compared to untreated laminate

#### **Halpin-Tsai and Periodic Microstructure Model Equations Used for Modeling Shear Modulus of CNT Treated E-glass/Epoxy Laminates**

The in-plane shear modulus,  $G_{12}$ , was estimated using the periodic microstructure model<sup>S1</sup>, equation (S1):

$$G_{12} = G_m \left[ 1 + \frac{v_f (1 - G_m / G_f)}{G_m / G_f + S_3 (1 - G_m / G_f)} \right] \quad (S1)$$

Where  $v_f$  is the fiber volume fraction,  $G_m$  is the shear modulus of the epoxy matrix and  $G_f$  is the shear modulus of the E-glass fiber and  $S_3$  is determined from equation (S2)

$$S_3 = 0.49247 - 0.47603v_f - 0.05748v_f^2 \quad (S2)$$

In order to calculate the shear modulus of the matrix, it was assumed that the CNT coating present on the fibers was a constituent of the matrix. The CNTs were assumed to be present as a 3-D randomly oriented fibers in the epoxy matrix and  $G_{\text{random}}$  was estimated from equation (S3)<sup>S2</sup>.

$$G_{\text{random}} = \frac{1}{8} E_{11} + \frac{1}{4} E_{22} \quad (S3)$$

Where  $E_{11}$  and  $E_{22}$  are the tensile moduli in the principal and transverse fiber directions, respectively.  $E_{11}$  was calculated using equation (S4):

$$E_{11} = \frac{1 + 2\left(\frac{l_f}{d_f}\right)\eta_L v_f}{1 - \eta_L v_f} E_m \quad (S4)$$

Where  $l_f$  and  $d_f$  are the CNT length and diameter, respectively,  $E_m$  is the tensile modulus of the matrix and  $\eta_L$  was determined from equation (S5):

$$\eta_L = \frac{\left(\frac{\alpha E_f}{E_m}\right) - 1}{\left(\frac{\alpha E_f}{E_m}\right) + 2\left(\frac{l_f}{d_f}\right)} \quad (S5)$$

Where  $\alpha$  is an orientation factor equal to 1/6 for the case where the CNT dimensions are significantly smaller than the laminate thickness<sup>S3</sup>.

$E_{22}$  was calculated using equation (S6):

$$E_{22} = \frac{1 + 2\eta_T v_f}{1 - \eta_T v_f} E_m \quad (S6)$$

Where  $\eta_T$  was determined from equation (S7):

$$\eta_T = \frac{\left(\frac{\alpha E_f}{E_m}\right) - 1}{\left(\frac{\alpha E_f}{E_m}\right) + 2} \quad (S7)$$

**Table S3.** Material property data used for modeling E-glass/epoxy shear modulus

| Material Property             | CNTs | Epon 862/Epikure W | E-glass |
|-------------------------------|------|--------------------|---------|
| Tensile Modulus E (GPa)       | 200  | 2.72               | 72.4    |
| Poisson ratio (v)             | ---  | 0.33               | 0.22    |
| Shear Modulus G (GPa)         | ---  | 1.02               | 29.7    |
| Density (g.cm <sup>-3</sup> ) | 2.0  | 1.2                | 2.55    |

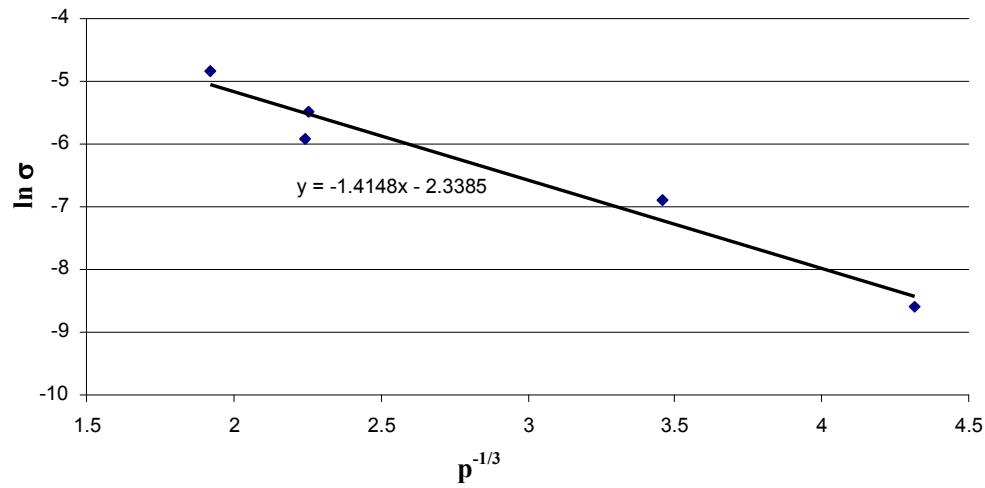

**Figure S5.** Plot of  $\ln \sigma$  vs.  $p^{-1/3}$  for CNT treated E-glass/epoxy laminates indicating a linear trend indicative of quantum tunnelling

## REFERENCES

- 
- (S1) Luciano, R.; Barbero, E. J. *Int. J. Solids Struct.* **1994**, 31, 2933-2944  
(S2) Halpin, J. C. *J Compos Mater* **1969**, 3, 732–734.  
(S3) Yeh, M. –K.; Tai, N. –H.; Liu, J. –H. *Carbon* **2006**, 44, 1-9.
